# Supplementary material for: Probabilistic program inference in network-based epidemiological simulations
Source: PLOS journal article supplement (doi:10.1371/journal.pcbi.1010591), 2022-11-07
Supplement: S3 (10.1371/journal.pcbi.1010591.s003) [file journal.pcbi.1010591.s003]

## S3 Appendix. Additional Experimental Details and Results

**Hyperparameter Tuning** We list the hyperparameter values we tried in Table A. We selected the bold parameters based on training stability and goodness of fit.

| Hyperparameter                                                                                                   | Range                                                                   |
|------------------------------------------------------------------------------------------------------------------|-------------------------------------------------------------------------|
| Observational Noise Scaling ( $\nu$ )                                                                            | 0.00025, 0.00035, <b>0.0005</b>                                         |
| Learning Rate                                                                                                    | $10^{-6}$ , <b><math>10^{-5}</math></b> , $5 \cdot 10^{-4}$ , $10^{-4}$ |
| Samples Per Iteration                                                                                            | 20, 50, 75, <b>120</b> , 200                                            |
| Prior Initial Exposed Logit Mean ( $\mu_c^\rho$ )                                                                | <b>-7</b> , -6.5, -6                                                    |
| Prior Initial Exposed Logit StdDev ( $\sigma_\rho$ )                                                             | <b>0.0</b> , 1.0, 1.6                                                   |
| Prior $\beta^E$ Logit Mean ( $\mu_{\beta^E}$ )                                                                   | -2.2, <b>-1.39</b> , -0.85                                              |
| Prior shared disease parameter<br>StdDev ( $\sigma_{\beta^E}, \sigma_{\beta^I}, \sigma_\lambda, \sigma_\gamma$ ) | <b>0.0</b> , 0.47, 1.16                                                 |
| Expected Initial Exposed Fraction $E_0$                                                                          | 0.02, <b>0.04</b> , 0.08                                                |

**Table A.** Hyperparameter tuning ranges. Bold values correspond to best performance.

**Setting Initial Exposed for Baselines** Both the compartmental SEIR model and topological-SEIR model require an initial exposure percentage. However, neither the CE-EM nor the  $R_t$ -analytic method fits this value. Thus to compare our models fairly, we have used the best MDAE over six different initial exposures: 1) uniform exposure of 0.5%, 2) uniform exposure of 1%, 3) uniform exposure of 2%, 4) uniform exposure of 5%, 5) inferred initial exposure using BBVI with high observational noise  $\nu = 0.0005$ , 6) inferred initial exposure using BBVI with low observational noise  $\nu = 0.00025$ .

**Baseline CE-EM results** See S1 Fig for plots of daily SEIR and cumulative infection counts simulated using SEIR equations using parameters estimated by CE-EM.
